# Supplementary material for: Barrel-shaped design of the forearm free flap for lower lip reconstruction: a pilot case-control study
Source: PubMed Central journal article supplement (PMC7291574; doi:10.1186/s12893-020-00792-x), 2020-06-12
Supplement: 12893_2020_792_MOESM2_ESM.pdf [file 12893_2020_792_MOESM2_ESM.pdf]

## Head & Neck cancer module: QLQ-H&N35

The head & neck cancer module is meant for use among a wide range of patients with head & neck cancer, varying in disease stage and treatment modality (i.e. surgery, radiotherapy and chemotherapy) (Bjordal and Kaasa, 1992; Bjordal *et al.*, 1994, 1999, 2000). The module comprises 35 questions assessing symptoms and side effects of treatment, social function and body image/sexuality (Appendix 2b). The module has been developed according to the guidelines, and pretested on patients from Norway, Sweden, Denmark, the UK and French-speaking Belgium. It has been field tested in Norway, Sweden and The Netherlands, and in a large cross-cultural study involving more than ten countries (EORTC Protocol 15941).

### Scoring of the head & neck cancer module

The head & neck cancer module incorporates seven multi-item scales that assess pain, swallowing, senses (taste and smell), speech, social eating, social contact and sexuality. There are also eleven single items. For all items and scales, high scores indicate more problems (i.e. there are no function scales in which high scores would mean better functioning).

The scoring approach for the QLQ-H&N35 is identical in principle to that for the symptom scales / single items of the QLQ-C30.

| Scale name                    | Scale | Number of items | Item range* | QLQ-H&N35 Item numbers |
|-------------------------------|-------|-----------------|-------------|------------------------|
| <b>Symptom scales / items</b> |       |                 |             |                        |
| Pain                          | HNPA  | 4               | 3           | 1 – 4                  |
| Swallowing                    | HNSW  | 4               | 3           | 5 – 8                  |
| Senses problems               | HNSE  | 2               | 3           | 13,14                  |
| Speech problems               | HNSP  | 3               | 3           | 16,23,24               |
| Trouble with social eating    | HNSO  | 4               | 3           | 19 – 22                |
| Trouble with social contact   | HNSC  | 5               | 3           | 18,25 – 28             |
| Less sexuality                | HNSX  | 2               | 3           | 29,30                  |
| Teeth                         | HNTE  | 1               | 3           | 9                      |
| Opening mouth                 | HNOM  | 1               | 3           | 10                     |
| Dry mouth                     | HNDR  | 1               | 3           | 11                     |
| Sticky saliva                 | HNSS  | 1               | 3           | 12                     |
| Coughing                      | HNCO  | 1               | 3           | 15                     |
| Felt ill                      | HNFI  | 1               | 3           | 17                     |
| Pain killers                  | HNPK  | 1               | 1           | 31                     |
| Nutritional supplements       | HNNU  | 1               | 1           | 32                     |
| Feeding tube                  | HNFE  | 1               | 1           | 33                     |
| Weight loss                   | HNWL  | 1               | 1           | 34                     |
| Weight gain                   | HNWG  | 1               | 1           | 35                     |

\* “Item range” is the difference between the possible maximum and the minimum response to individual items.
