# Supplementary material for: Barrel-shaped design of the forearm free flap for lower lip reconstruction: a pilot case-control study
Source: PubMed Central journal article supplement (PMC7291574; doi:10.1186/s12893-020-00792-x), 2020-06-12
Supplement: 12893_2020_792_MOESM3_ESM.pdf [file 12893_2020_792_MOESM3_ESM.pdf]

## 附件五 生活品質量表

說明：此次住院階段裡，您多常有以下問題？請將最接近您的感受打『v』

| 項             | 目                      | 很常有(4) | 偶爾有(3) | 不常有(2) | 從來沒有(1) |
|---------------|------------------------|--------|--------|--------|---------|
| <b>疼痛問題</b>   |                        |        |        |        |         |
| 1             | 口腔疼痛                   |        |        |        |         |
| 2             | 下顎疼痛                   |        |        |        |         |
| 3             | 口腔腔酸痛                  |        |        |        |         |
| 4             | 喉嚨痛                    |        |        |        |         |
| <b>吞嚥問題</b>   |                        |        |        |        |         |
| 5             | 吞嚥液體時曾有困難              |        |        |        |         |
| 6             | 吞嚥濃湯時曾有困難              |        |        |        |         |
| 7             | 吞嚥固體食物時曾有困難            |        |        |        |         |
| 8             | 吞嚥時曾經噎到                |        |        |        |         |
| <b>感覺問題</b>   |                        |        |        |        |         |
| 9             | 曾有嗅覺方面的問題              |        |        |        |         |
| 10            | 曾有味覺方面的問題              |        |        |        |         |
| <b>語言問題</b>   |                        |        |        |        |         |
| 11            | 曾有聲音沙啞                 |        |        |        |         |
| 12            | 與別人交談感到困擾              |        |        |        |         |
| 13            | 用電話交談接觸曾感到困擾           |        |        |        |         |
| <b>社交飲食問題</b> |                        |        |        |        |         |
| 14            | 進食困擾                   |        |        |        |         |
| 15            | 在家人面前進食困擾              |        |        |        |         |
| 16            | 在其他人面前進食困擾             |        |        |        |         |
| 17            | 難以享受進餐的樂趣              |        |        |        |         |
| <b>社會接觸問題</b> |                        |        |        |        |         |
| 18            | 外觀困擾                   |        |        |        |         |
| 19            | 和家人交往接觸曾感到困擾           |        |        |        |         |
| 20            | 和朋友交往接觸曾感到困擾           |        |        |        |         |
| 21            | 外出到公共場合曾感到困擾           |        |        |        |         |
| 22            | 和家人或朋友有身體接觸時，<br>曾感到困擾 |        |        |        |         |
| <b>性生活問題</b>  |                        |        |        |        |         |
| 23            | 對「性」有沒有樂趣              |        |        |        |         |

| 項  | 目           | 很常有(4) | 偶爾有(3) | 不常有(2) | 從來沒有(1) |
|----|-------------|--------|--------|--------|---------|
| 24 | 感到比較無法享受性生活 |        |        |        |         |

說明：此次住院階段裡，您是否有以下問題?或是否接受止痛藥或營養劑或餵食管，請將您的狀況打『v』

| 項  | 目       | 有 (2) | 沒有 (1) |
|----|---------|-------|--------|
| 25 | 牙齒方面的問題 |       |        |
| 26 | 張口問題    |       |        |
| 27 | 口乾問題    |       |        |
| 28 | 唾液黏稠問題  |       |        |
| 29 | 咳嗽問題    |       |        |
| 30 | 病態感     |       |        |
| 31 | 使用止痛藥   |       |        |
| 32 | 使用營養劑   |       |        |
| 33 | 使用餵食管   |       |        |
| 34 | 體重減輕    |       |        |
| 35 | 體重增加    |       |        |
